# Supplementary material
Source: PubMed Central journal article supplement (PMC3710688)
Supplement: NIHMS486478-supplement-1_si_001.pdf [file NIHMS486478-supplement-1_si_001.pdf]

**Table S1.** CID product ions of the  $[\text{Co}^{2+}(\text{FG} - \text{H})(\text{Aux})_2]^+$  complex of 7-hydroxyflavanone. All minor fragment ions are listed in order of decreasing  $m/z$ .

| UGT enzyme | CID base peak | other minor fragment ions     | assignment      |
|------------|---------------|-------------------------------|-----------------|
| 1A1        | -GlcA         | -Agl, -(GlcA+Aux), -(Agl+Aux) | 7-O-glucuronide |
| 1A3        | -GlcA         | -Agl, -(GlcA+Aux), -(Agl+Aux) | 7-O-glucuronide |
| 1A4        | NA            | NA                            | NA              |
| 1A6        | -GlcA         | -Agl, -(GlcA+Aux), -(Agl+Aux) | 7-O-glucuronide |
| 1A7        | -GlcA         |                               | 7-O-glucuronide |
| 1A8        | -GlcA         | -Agl, -(GlcA+Aux), -(Agl+Aux) | 7-O-glucuronide |
| 1A9        | -GlcA         | -Agl, -(GlcA+Aux), -(Agl+Aux) | 7-O-glucuronide |
| 1A10       | -GlcA         | -Agl, -(GlcA+Aux), -(Agl+Aux) | 7-O-glucuronide |

**Table S2.** CID product ions of the  $[\text{Co}^{2+}(\text{FG} - \text{H})(\text{Aux})_2]^+$  complex of 3'-hydroxyflavanone. All minor fragment ions are listed in order of decreasing  $m/z$ .

| UGT enzyme | CID base peak | other minor fragment ions <sup>a</sup> | assignment       |
|------------|---------------|----------------------------------------|------------------|
| 1A1        | -Aux          | -GlcA, -Agl, -(Agl+Aux)                | 3'-O-glucuronide |
| 1A3        | -Aux          | -(Agl+Aux)                             | 3'-O-glucuronide |
| 1A4        | NA            | NA                                     | NA               |
| 1A6        | -Aux          | -Agl, -(GlcA+Aux), -(Agl+Aux)          | 3'-O-glucuronide |
| 1A7        | -Aux          | -GlcA, -(GlcA+Aux), -(Agl+Aux)         | 3'-O-glucuronide |
| 1A8        | -Aux          | -(Agl+Aux)                             | 3'-O-glucuronide |
| 1A9        | -Aux          | -GlcA, -(GlcA+Aux), -(Agl+Aux)         | 3'-O-glucuronide |
| 1A10       | -Aux          | -GlcA, -Agl, -(Agl+Aux)                | 3'-O-glucuronide |

<sup>a</sup> Variation in fragment ions was noted between some UGT1A reactions due to low S/N for spectra of glucuronides present in low or trace concentrations.

**Table S3.** CID product ions of the  $[\text{Co}^{2+}(\text{FG} - \text{H})(\text{Aux})_2]^+$  complex of 4'-hydroxyflavanone. All minor fragment ions are listed in order of decreasing  $m/z$ .

| UGT enzyme | CID base peak(s)^ | other minor fragment ions <sup>a</sup> | assignment       |
|------------|-------------------|----------------------------------------|------------------|
| 1A1        | -GlcA             | -Aux, -Agl, -(GlcA+Aux), -(Agl+Aux)    | 4'-O-glucuronide |
| 1A3        | -GlcA, -(Agl+Aux) | -Aux, -Agl, -(GlcA+Aux)                | 4'-O-glucuronide |
| 1A4        | NA                | NA                                     | NA               |
| 1A6        | -(Agl+Aux)        | -GlcA, -Aux, -Agl, -(GlcA+Aux)         | 4'-O-glucuronide |
| 1A7        | NA                | NA                                     | NA               |
| 1A8        | -GlcA             | -Aux, -Agl, -(GlcA+Aux), -(Agl+Aux)    | 4'-O-glucuronide |
| 1A9        | NA                | NA                                     | NA               |
| 1A10       | -GlcA, -(Agl+Aux) | -Aux, -Agl, -(GlcA+Aux)                | 4'-O-glucuronide |

<sup>a</sup> Variation in fragment ions was noted between some UGT1A reactions due to low S/N for spectra of glucuronides present in low or trace concentrations.

**Table S4.** CID product ions of the  $[\text{Co}^{2+}(\text{FG} - \text{H})(\text{Aux})_2]^+$  complex of 2'-hydroxychalcone. All minor fragment ions are listed in order of decreasing  $m/z$ .

| UGT enzyme | CID base peak | other minor fragment ions <sup>a</sup> | assignment       |
|------------|---------------|----------------------------------------|------------------|
| 1A1        | -(GlcA + Aux) |                                        | 2'-O-glucuronide |
| 1A3        | -(GlcA + Aux) | -Aux                                   | 2'-O-glucuronide |
| 1A4        | NA            | NA                                     | NA               |
| 1A6        | -(GlcA + Aux) |                                        | 2'-O-glucuronide |
| 1A7        | -(GlcA + Aux) |                                        | 2'-O-glucuronide |
| 1A8        | -(GlcA + Aux) | -Aux                                   | 2'-O-glucuronide |
| 1A9        | -(GlcA + Aux) |                                        | 2'-O-glucuronide |
| 1A10       | -(GlcA + Aux) | -Aux                                   | 2'-O-glucuronide |

<sup>a</sup> Variation in fragment ions was noted between some UGT1A reactions due to low S/N for spectra of glucuronides present in low or trace concentrations.

**Table S5.** CID product ions of the  $[\text{Co}^{2+}(\text{FG} - \text{H})(\text{Aux})_2]^+$  complex of 2',4'-dihydroxychalcone. All minor fragment ions are listed in order of decreasing  $m/z$ .

| UGT enzyme | CID base peak | other minor fragment ions <sup>a</sup>             | assignment                  |
|------------|---------------|----------------------------------------------------|-----------------------------|
| 1A1        | -GlcA         | -Agl, -(GlcA+Aux), -(Agl+Aux)                      | 7-O-glucuronide (flavanone) |
|            | -(GlcA + Aux) | -GlcA                                              | 2'-O-glucuronide            |
|            | -Aux          | -GlcA, -(GlcA+Aux)                                 | 4'-O-glucuronide            |
| 1A3        | -GlcA         | -Agl, -(GlcA+Aux), -(Agl+Aux)                      | 7-O-glucuronide (flavanone) |
|            | -(GlcA + Aux) | -GlcA, -Agl, (2Aux+Co)                             | 2'-O-glucuronide            |
|            | -Aux          | -GlcA, -(GlcA+Aux), -(Agl+Aux)                     | 4'-O-glucuronide            |
| 1A4        | NA            | NA                                                 | NA                          |
| 1A6        | -(GlcA + Aux) | -GlcA                                              | 2'-O-glucuronide            |
|            | -Aux          | -GlcA, -(GlcA+Aux), -(Agl+Aux)                     | 4'-O-glucuronide            |
| 1A7        | -GlcA         | -H <sub>2</sub> O, -Agl fragment, -Aux, -(Agl+Aux) | 7-O-glucuronide (flavanone) |
|            | -(GlcA + Aux) |                                                    | 2'-O-glucuronide            |
|            | -Aux          | -GlcA, -(GlcA+Aux), -(Agl+Aux)                     | 4'-O-glucuronide            |
| 1A8        | -GlcA         | -Agl, -(GlcA+Aux), -(Agl+Aux)                      | 7-O-glucuronide (flavanone) |
|            | -(GlcA + Aux) |                                                    | 2'-O-glucuronide            |
|            | -Aux          | -GlcA, -(GlcA+Aux), -(Agl+Aux)                     | 4'-O-glucuronide            |
| 1A9        | -GlcA         | -Agl, -(GlcA+Aux), -(Agl+Aux)                      | 7-O-glucuronide (flavanone) |
|            | -(GlcA + Aux) | -GlcA                                              | 2'-O-glucuronide            |
|            | -Aux          | -GlcA, -(GlcA+Aux)                                 | 4'-O-glucuronide            |
| 1A10       | -GlcA         |                                                    | 7-O-glucuronide (flavanone) |
|            | -Aux          | -GlcA, -(GlcA+Aux)                                 | 4'-O-glucuronide            |

<sup>a</sup> Variation in fragment ions was noted between some UGT1A reactions due to low S/N for spectra of glucuronides present in low or trace concentrations.

**Table S6.** CID product ions of the  $[\text{Co}^{2+}(\text{FG} - \text{H})(\text{Aux})_2]^+$  complex of 3,2'-dihydroxychalcone. All minor fragment ions are listed in order of decreasing  $m/z$ .

| UGT enzyme | CID base peak | other minor fragment ions <sup>a</sup> | assignment                    |
|------------|---------------|----------------------------------------|-------------------------------|
| 1A1        | -Aux          | -GlcA, -Agl, -(GlcA+Aux), -(Agl+Aux)   | 3'-O-glucuronide (flavanone)  |
|            | -Aux          | -(GlcA+Aux)                            | 3-O-glucuronide               |
| 1A3        | -Aux          | -(GlcA+Aux), -(Agl+Aux)                | 3'-O-glucuronide (flavanone)  |
|            | -Aux          | -(GlcA+Aux)                            | 3-O-glucuronide               |
| 1A4        | NA            | NA                                     | NA                            |
| 1A6        | -Aux          | -GlcA, -(GlcA+Aux), -(Agl+Aux)         | 2'-O-glucuronide <sup>b</sup> |
| 1A7        | -Aux          | -(GlcA+Aux), -(Agl+Aux)                | 3'-O-glucuronide (flavanone)  |
|            | -Aux          | -(Agl+Aux)                             | 3-O-glucuronide               |
| 1A8        | -Aux          | -GlcA, -Agl, -(GlcA+Aux), -(Agl+Aux)   | 2'-O-glucuronide              |
|            | -Aux          | -(2Aux-GlcA), (GlcA+Aux+Co)            | 3'-O-glucuronide (flavanone)  |
|            | -Aux          | -Agl, -(GlcA+Aux), -(Agl+Aux)          | 3-O-glucuronide               |
| 1A9        | -(GlcA+Aux)   | -GlcA, -Aux, -(Agl+Aux)                | 2'-O-glucuronide              |
|            | -Aux          | -(Agl+Aux)                             | 3'-O-glucuronide (flavanone)  |
|            | -Aux          | -(GlcA+Aux)                            | 3-O-glucuronide               |
| 1A10       | -Aux          | -GlcA, -Agl, -(GlcA+Aux), -(Agl+Aux)   | 3'-O-glucuronide (flavanone)  |
|            | -Aux          | -(GlcA+Aux), -(Agl+Aux)                | 3-O-glucuronide               |

<sup>a</sup> Variation in fragment ions was noted between some UGT1A reactions due to low S/N for spectra of glucuronides present in low or trace concentrations. <sup>b</sup> Present in trace amounts; may be 2'-O-glucuronide according to retention time or 3'-O-glucuronide (flavanone) according to CID fragmentation pattern.

**Table S7.** CID product ions of the  $[\text{Co}^{2+}(\text{FG} - \text{H})(\text{Aux})_2]^+$  complex of 4,2'-dihydroxychalcone. All minor fragment ions are listed in order of decreasing  $m/z$ .

| UGT enzyme | CID base peak | other minor fragment ions <sup>a</sup>           | assignment                                |
|------------|---------------|--------------------------------------------------|-------------------------------------------|
| 1A1        | -GlcA         | -Aux, -Agl, -(GlcA+Aux), -(Agl+Aux)              | 4'-O-glucuronide (flavanone)              |
|            | -(GlcA+Aux)   | -GlcA, -Aux                                      | 2'-O-glucuronide                          |
|            | -Aux          | -(GlcA+Aux)                                      | 4-O-glucuronide                           |
| 1A3        | -GlcA         | -Aux, -Agl, -(GlcA+Aux), -(GlcA+Agl), -(Agl+Aux) | 4'-O-glucuronide (flavanone)              |
|            | -(GlcA+Aux)   | -GlcA, -Aux, -Agl, -(Agl+Aux)                    | 2'-O-glucuronide                          |
|            | -Aux          | -(GlcA+Aux)                                      | 4-O-glucuronide                           |
| 1A4        | NA            | NA                                               | NA                                        |
| 1A6        | -GlcA         | -Aux, -Agl, -(GlcA+Aux), -(GlcA+Agl), -(Agl+Aux) | 4'-O-glucuronide (flavanone)              |
|            | -(GlcA+Aux)   | -Aux, -GlcA                                      | 2'-O-glucuronide                          |
|            | -Aux          |                                                  | 4-O-glucuronide                           |
| 1A7*       | -GlcA         | -(GlcA+Agl)                                      | 4'-O-glucuronide (flavanone)              |
| 1A8*       | -(GlcA+Aux)   | -Aux, -GlcA, -(Agl+Aux)                          | 2'-O-glucuronide                          |
| 1A9*       | -(GlcA+Aux)   | -GlcA                                            | 2'-O-glucuronide                          |
|            | 853 m/z       | -(GlcA+Aux), -Aux                                | 4-O-glucuronide                           |
| 1A10       | -(Agl+Aux)    | -GlcA, -Agl, -(GlcA+Aux), -Aux                   | 4'-O-glucuronide (flavanone) <sup>b</sup> |
|            | -Aux          | -(GlcA+Aux)                                      | 4-O-glucuronide                           |

<sup>a</sup> Variation in fragment ions was noted between some UGT1A reactions due to low S/N for spectra of glucuronides present in low or trace concentrations. <sup>b</sup> Present in trace amounts; may be 4'-O-glucuronide (flavanone) or 2'-O-glucuronide.

**Table S8.** CID product ions of the  $[\text{Co}^{2+}(\text{FG} - \text{H})(\text{Aux})]^+$  complex of alpinetin. All minor fragment ions are listed in order of decreasing  $m/z$ .

| UGT enzyme | CID base peak | other minor fragment ions <sup>a</sup> | assignment                         |
|------------|---------------|----------------------------------------|------------------------------------|
| 1A1        | -Agl          | -GlcA                                  | 7-O-glucuronide-5-methoxyflavanone |
| 1A3        | -Agl          | -GlcA, -Agl fragment, -(GlcA+Aux)      | 7-O-glucuronide-5-methoxyflavanone |
| 1A4        | NA            | NA                                     | NA                                 |
| 1A6        | NA            | NA                                     | NA                                 |
| 1A7        | NA            | NA                                     | NA                                 |
| 1A8        | -Agl          | -GlcA, -Agl fragment, -(GlcA+Aux)      | 7-O-glucuronide-5-methoxyflavanone |
| 1A9        | -Agl          | -GlcA, -(GlcA+Aux)                     | 7-O-glucuronide-5-methoxyflavanone |
| 1A10       | -Agl          | -GlcA                                  | 7-O-glucuronide-5-methoxyflavanone |

<sup>a</sup> Variation in fragment ions was noted between some UGT1A reactions due to low S/N for spectra of glucuronides present in low or trace concentrations.



**Table S9.** CID product ions of the  $[\text{Co}^{2+}(\text{FG} - \text{H})(\text{Aux})]^+$  complex of cardamonin. All minor fragment ions are listed in order of decreasing  $m/z$ .

| UGT enzyme | CID base peak | other minor fragment ions <sup>a</sup>           | assignment                         |
|------------|---------------|--------------------------------------------------|------------------------------------|
| 1A1        | -Agl          | -Agl fragment, -GlcA                             | 7-O-glucuronide-5-methoxyflavanone |
|            | -GlcA         |                                                  | 2'-O-glucuronide                   |
|            | -GlcA         |                                                  | 4'-O-glucuronide                   |
|            |               |                                                  | DG                                 |
| 1A3        | -Agl          | -Agl fragment, -GlcA                             | 7-O-glucuronide-5-methoxyflavanone |
|            | -GlcA         |                                                  | 4'-O-glucuronide                   |
| 1A4        | NA            | NA                                               | NA                                 |
| 1A6        | -GlcA         |                                                  | 2'-O-glucuronide                   |
|            | 657 m/z       | -Agl fragment, -GlcA, -Aux                       | 4'-O-glucuronide                   |
| 1A7        | -Agl          | -GlcA, -(GlcA+Aux), -(GlcA+Aux+CO <sub>2</sub> ) | 7-O-glucuronide-5-methoxyflavanone |
|            | -GlcA         |                                                  | 2'-O-glucuronide                   |
|            | -GlcA         |                                                  | 4'-O-glucuronide                   |
| 1A8        | -Agl          | -GlcA, -(GlcA+Aux)                               | 7-O-glucuronide-5-methoxyflavanone |
|            | -GlcA         |                                                  | 4'-O-glucuronide                   |
| 1A9        | -Agl          | -GlcA, -(GlcA+Aux), -(GlcA+Aux+CO <sub>2</sub> ) | 7-O-glucuronide-5-methoxyflavanone |
|            | -GlcA         |                                                  | 2'-O-glucuronide                   |
|            | -GlcA         |                                                  | 4'-O-glucuronide                   |
| 1A10       | ND            | ND                                               | ND                                 |
|            | -GlcA         |                                                  | 4'-O-glucuronide                   |

<sup>a</sup> Variation in fragment ions was noted between some UGT1A reactions due to low S/N for spectra of glucuronides present in low or trace concentrations.
